# Supplementary material for: Assessment and Appliction of Whole-Herd-Sampling, qPCR-Based-Testing, and Precision-Removal Method in Eliminating ASFv in Four Large Swine Herds in China
Source: Research Square preprint supplement (doi:10.21203/rs.3.rs-954531/v1), 2021-11-02
Supplement: Supplementary file 1 [file f442543bc34c58b81b19965d.docx]

**Supplemental Figure s1-s4**


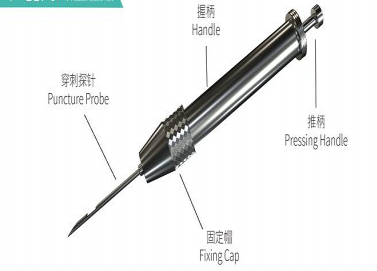


**Figure s1 Picture of LN sample collector.**


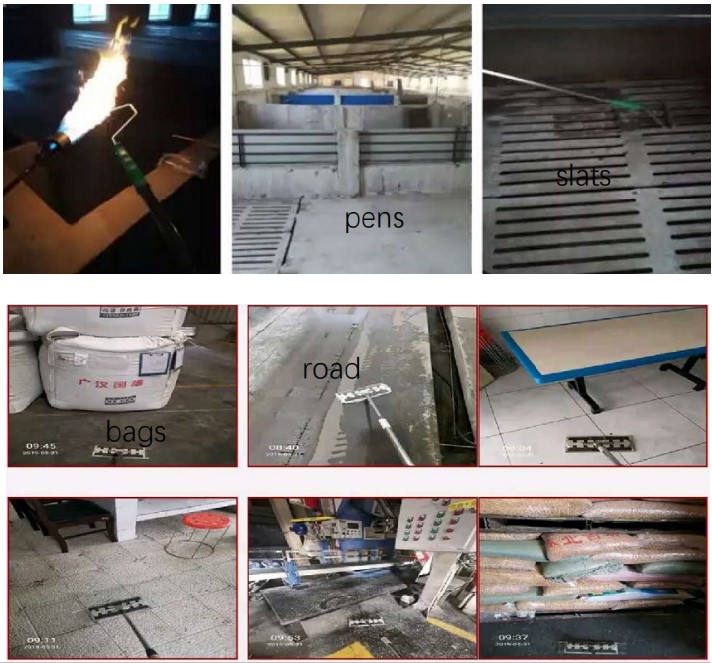


**Fig. s2 Picture of Whole surface (WS) sampling.**


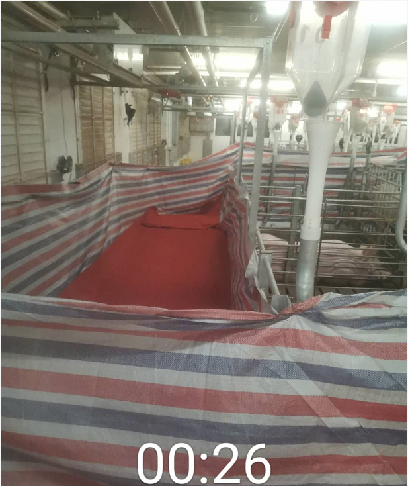


**Fig. S3 Picture of U-shape tunnel made of stripped clot to remove pigs.**

**Farm 2**

**Farm 3**

**Farm 4**

**Fig. s4 Electronic maps of Farm 1, 2, 3 and 4 at day 0, respectively.** Red square indicated positive site.
